# Supplementary material for: Horizontal transfer between loose compartments stabilizes replication of fragmented ribozymes
Source: PubMed Central journal article supplement (PMC6581272; doi:10.1371/journal.pcbi.1007094), 2019-06-06
Supplement: pcbi.1007094.s003.pdf [file pcbi.1007094.s003.pdf]

### S3 Different replication rate of the fragments $X$ and $Y$

In the main text, we assume that the replication rates  $k_x$  and  $k_y$  are the same in the reactions (2) and (3). Here, we show that the mechanism of the horizontal transfer apply even when the  $k_x$  and  $k_y$  are different, provided that there is not a large difference. In this case, the ratio of the number of  $X$ -dominant and  $Y$ -dominant cells change to compensate for the difference of  $k_x$  and  $k_y$  [Figure S2]. When  $k_x$  is greater than  $k_y$  [Figure S2A], the number of  $X$ -dominant cells decreases and that of  $Y$ -dominant cells increases. On the other hand, when  $k_x$  is smaller than  $k_y$  [Figure S2B], the number of  $X$ -dominant cells increases. When the difference increases  $\approx 20\%$  or larger, a faster-replicating fragment dominates the system and the system cannot continue growth [Figure S2C].

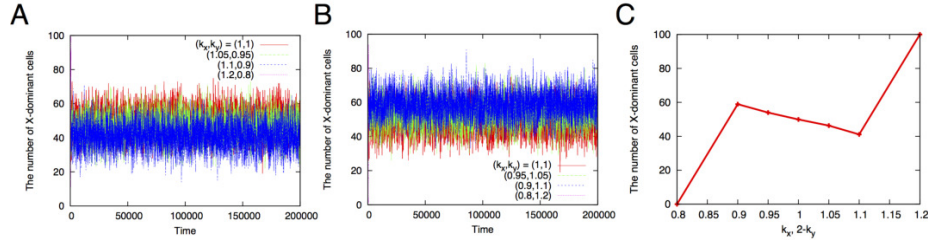

Figure S2: The number of  $X$ -dominant cells for (A)  $(k_x, k_y) = (1, 1), (1.05, 0.95), (1.1, 0.9), (1.2, 0.8)$  and (B)  $(k_x, k_y) = (1, 1), (0.95, 1.05), (0.9, 1.1), (0.8, 1.2)$ . (C) The average of the number of  $X$ -dominant cells is shown as a function of  $k_x$ . The parameters are  $D = 0.001$ ,  $V_{Div} = 1000$ ,  $N_{cell} = 100$ , and  $k^f = k^b = 1$ .
